# Supplementary material for: Tracking of lung function from 10 to 35 years after being born extremely preterm or with extremely low birth weight
Source: PubMed Central journal article supplement — Thorax. 2022 Apr 11;77(8):790–8. doi: 10.1136/thoraxjnl-2021-218400 (PMC9340024; doi:10.1136/thoraxjnl-2021-218400), 2022-04-11
Supplement: thoraxjnl-2021-218400supp001.pdf [file thoraxjnl-2021-218400supp001.pdf]

## Online data supplement

### Development of lung function from 10 to 35 years of age after extremely preterm birth

Bårdsen Tonje, Røksund Ola, Benestad Merete, Hufthammer Karl O, Clemm Hege, Mikalsen

Ingvild B, Øymar Knut, Markestad Trond, Halvorsen Thomas, Vollsæter Maria

#### Contents:

##### Definitions

##### Subject inclusion

##### Figure E1 legend and caption

**Table E1:** Neonatal data for extremely preterm study participants-and non-participants in the 99–00 cohort

**Table E2:** Background variables on all visits

**Table E3:** Predictors for low FEV<sub>1</sub> z-score in EP subjects, based on multiple regression analysis ( $n = 121$ )

##### References

## Definitions

Gestational age was determined by the mothers' last menstruation for the 82–85 cohort, and by ultrasound scans at GA 17–18 weeks for the 91-92 and 99–00 cohort. Birthweight z-scores were extracted from Norwegian growth curves <sup>1</sup>, and small for gestational age (SGA) was defined as BW < 10<sup>th</sup> percentile for GA. BPD was defined as the need for supplemental oxygen or respiratory support at postmenstrual age  $\geq$  36 weeks according to the definition proposed by Shennan et al <sup>2</sup>. Further classification into mild, moderate and severe BPD according to the NICHD statement was not possible, as oxygen was delivered as "low flow oxygen" on a nasal cannula and quantified in litres, not in FiO<sub>2</sub> <sup>3</sup>. Atopy was defined as sensitisation to at least one common allergen by either skin prick or specific serum IgE tests. Current asthma was defined as a combination of reported wheeze during the previous 3 months and either use of asthma medication during the previous 3 months, or having reported 'asthma ever'. Self-reported smoking was defined as any current use of cigarettes.

## Subject inclusion

The region was served by two neonatal intensive care units (NICU) during the inclusion period, and follow-up was performed according to place of birth; Haukeland University Hospital for the 82-85 and 91-92 cohorts, and additionally Stavanger University Hospital for the 99-00 cohort. The 99-00 cohort was a regional part of a larger, national cohort<sup>4</sup>. All but three participants were Caucasian.

**Figure legends:**

**Figure E1:** Measured FEV<sub>1</sub>/expected peak FEV<sub>1</sub> with 95% confidence intervals For EP born with or without BPD and term-born controls.

**Figure Captions:**

**Figure E1:** Mean measured FEV<sub>1</sub> as fraction of expected peak FEV<sub>1</sub> (with 95% confidence intervals) in three population based cohorts born extremely preterm with or without BPD during three different decades and individually matched term-born controls (black line), based on mixed-effects longitudinal model. Expected peak FEV<sub>1</sub> was calculated for each individual using GLI reference equation. EP, subjects born extremely preterm (gestational age  $\leq 28$  weeks or birth weight  $\leq 1000$ g); FEV<sub>1</sub>, forced expiratory volume in 1 second; BPD, bronchopulmonary dysplasia: oxygen dependent at 36 weeks gestational age.

**Table E1: Neonatal data for extremely preterm study participants and non-participants in the 99–00 cohort**

| Variable                                                | Participants<br>(n = 64) | Non participants<br>(n = 24) | P-value |
|---------------------------------------------------------|--------------------------|------------------------------|---------|
| Female gender, n (%)                                    | 31 (48%)                 | 8 (33%)                      | 0.20    |
| Region Bergen, n (%)                                    | 39 (61%)                 | 9 (38%)                      | 0.05    |
| Birthweight in grams, mean (SD)                         | 844 (168)                | 847 (143)                    | 0.93    |
| Birthweight z-score, mean (SD)                          | -0.8 (1.3)               | -0.9 (1.2)                   | 0.61    |
| Gestational age in weeks, mean (SD)                     | 26.7 (1.6)               | 26.9 (1.7)                   | 0.70    |
| Postnatal days w/oxygen treatment*, median (quartiles)§ | 61 (40–78)               | 46 (39–71)                   | 0.23    |
| Days on CPAP, median (quartiles)                        | 29 (19–42)               | 24 (4–41)                    | 0.14    |
| Ventilator days*, median (quartiles)                    | 5 (2–9)                  | 3 (0–6)                      | 0.72    |
| EP BPD, n (%)                                           | 33 (52%)                 | 12 (50%)                     | 0.90    |
| Antenatal steroids, n (%)                               | 52 (81%)                 | 20 (83%)                     | 0.82    |
| Surfactant, n (%)                                       | 54 (84%)                 | 16 (67%)                     | 0.07    |
| Postnatal steroids, n (%)                               | 20 (31%)                 | 4 (17%)                      | 0.17    |
| PDA closure, medical or surgical (%)                    | 14 (22%)                 | 1 (4%)                       | 0.05    |
| Maternal smoking during pregnancy*, n (%)               | 15 (25%)                 | 13 (56%)                     | < 0.01  |

Categorical data were compared using Pearson's  $\chi^2$  test and continuous data using Welch's *t*-test. §Data compared using the Wilcoxon–Mann–Whitney test, due to skewed data.

\* Some missing data. The number of participants and non-participants was 60 and 21 for postnatal days with oxygen treatment, 64 and 23 for ventilator days, and 59 and 23 for maternal smoking.

Abbreviations: BPD: bronchopulmonary dysplasia (supplemental oxygen or respiratory support at postmenstrual age  $\geq 36$  weeks). BW: Birthweight. EP: extremely preterm (gestational age  $\leq 28$  weeks or birthweight  $\leq 1000$  g). PDA: Persistent ductus arteriosus.

Table E2: Background variables on all visits

| Age, mean (range)                     |           | 82-85      |            |            |            |            |            | 91-92      |            |  |  |  |  | 99-00 |  |  |  |
|---------------------------------------|-----------|------------|------------|------------|------------|------------|------------|------------|------------|--|--|--|--|-------|--|--|--|
|                                       |           | 18 (15-20) | 25 (22-27) | 34 (32-38) | 11 (10-12) | 18 (17-19) | 27 (26-28) | 12 (10-14) | 20 (18-21) |  |  |  |  |       |  |  |  |
| Total n (eligible N)                  | Term-born | 46 (46)    | 40 (46)    | 34 (46)    | 35 (35)    | 28 (35)    | 26 (34)    | 54 (57)    | 43 (57)    |  |  |  |  |       |  |  |  |
|                                       | EP        | 46 (51)    | 45 (51)    | 36 (48)    | 35 (35)    | 31 (35)    | 24 (35)    | 58 (88)    | 50 (88)    |  |  |  |  |       |  |  |  |
| Female sex, n (%)                     | Term-born | 21 (46%)   | 19 (48%)   | 19 (56%)   | 22 (63%)   | 20 (71%)   | 18 (69%)   | 25 (46%)   | 18 (42%)   |  |  |  |  |       |  |  |  |
|                                       | EP        | 21 (46%)   | 19 (42%)   | 16 (44%)   | 22 (63%)   | 18 (58%)   | 14 (58%)   | 28 (48%)   | 25 (50%)   |  |  |  |  |       |  |  |  |
| Height in cm, female, mean (SD)       | Term-born | 168 (6)    | 168 (6)    | 169 (7)    | 144 (6)    | 166 (5)    | 167 (5)    | 150 (9)    | 168 (8)    |  |  |  |  |       |  |  |  |
|                                       | EP        | 163 (5)    | 163 (4)    | 163 (4)    | 141 (9)    | 162 (7)    | 162 (6)    | 147 (7)    | 161 (6)    |  |  |  |  |       |  |  |  |
| Height in cm, male, mean (SD)         | Term-born | 177 (6)    | 177 (6)    | 178 (6)    | 146 (7)    | 178 (8)    | 180 (8)    | 153 (8)    | 183 (5)    |  |  |  |  |       |  |  |  |
|                                       | EP        | 175 (6)    | 175 (6)    | 174 (7)    | 139 (6)    | 174 (5)    | 175 (6)    | 147 (8)    | 175 (7)    |  |  |  |  |       |  |  |  |
| Weight in kg, female, mean (SD)       | Term-born | 67 (14)    | 69 (16)    | 75 (17)    | 39 (7)     | 64 (12)    | 70 (13)    | 41 (10)    | 66 (14)    |  |  |  |  |       |  |  |  |
|                                       | EP        | 60 (15)    | 66 (19)    | 67 (15)    | 35 (13)    | 61 (22)    | 62 (11)    | 38 (7)     | 59 (12)    |  |  |  |  |       |  |  |  |
| Weight in kg, male, mean (SD)         | Term-born | 68 (8)     | 76 (11)    | 85 (14)    | 38 (6)     | 75 (12)    | 80 (16)    | 41 (8)     | 79 (12)    |  |  |  |  |       |  |  |  |
|                                       | EP        | 66 (16)    | 80 (15)    | 78 (18)    | 35 (12)    | 73 (17)    | 79 (12)    | 39 (9)     | 73 (14)    |  |  |  |  |       |  |  |  |
| Participant response to questionnaire | Term-born | 46 (100)   | 40 (100)   | 31 (91)    | 35 (100)   | 28 (100)   | 26 (100)   | 54 (100)   | 15 (35)    |  |  |  |  |       |  |  |  |
|                                       | EP        | 46 (100)   | 45 (100)   | 33 (92)    | 35 (100)   | 31 (100)   | 24 (100)   | 58 (100)   | 33 (66)    |  |  |  |  |       |  |  |  |
| Self-reported smoking, n (%)          | Term-born | 14 (30%)   | 8 (20%)    | 5 (17%)    | .. ..      | 5 (18%)    | 3 (12%)    | .. ..      | 0 (0%)     |  |  |  |  |       |  |  |  |
|                                       | EP        | 15 (33%)   | 17 (40%)   | 3 (9%)     | .. ..      | 1 (3%)     | 1 (4%)     | .. ..      | 2 (6%)     |  |  |  |  |       |  |  |  |
| Wheeze last 12 months, n (%)          | Term-born | 12 (27%)   | 8 (31%)    | 3 (10%)    | 2 (6%)     | 10 (53%)   | 7 (27%)    | 5 (9%)     | 3 (20%)    |  |  |  |  |       |  |  |  |
|                                       | EP        | 16 (35%)   | 18 (46%)   | 8 (26%)    | 11 (31%)   | 12 (55%)   | 7 (29%)    | 8 (14%)    | 8 (24%)    |  |  |  |  |       |  |  |  |
| Asthma med. last 12 months, n (%)     | Term-born | 1 (2%)     | 3 (8%)     | 3 (10%)    | 1 (7%)     | 1 (4%)     | 2 (8%)     | 3 (6%)     | 0 (0%)     |  |  |  |  |       |  |  |  |
|                                       | EP        | 7 (15%)    | 5 (12%)    | 4 (12%)    | 5 (23%)    | 7 (23%)    | 4 (17%)    | 4 (7%)     | 4 (12%)    |  |  |  |  |       |  |  |  |
| Current asthma, n (%)                 | Term-born | 3 (7%)     | 3 (8%)     | 1 (3%)     | 1 (3%)     | 5 (18%)    | 5 (19%)    | 4 (7%)     | 1 (7%)     |  |  |  |  |       |  |  |  |
|                                       | EP        | 8 (17%)    | 8 (18%)    | 5 (15%)    | 10 (29%)   | 6 (19%)    | 2 (8%)     | 5 (9%)     | 4 (12%)    |  |  |  |  |       |  |  |  |

Abbreviations: Asthma med: asthma medication, EP: extremely preterm (gestational age  $\leq 28$  weeks or birth weight  $\leq 1000$  g). 'Current asthma' refers to a combination of wheeze in the last 12 months plus a positive response to the questions 'asthma ever' or 'asthma medication last 12 months'. % is percentage of all subjects that were evaluated at that time-point

**Table E3: Predictors for low FEV<sub>1</sub> z-score at 18 years in EP subjects, based on multiple regression analysis (n = 121)**

|                        | Estimate | 95% CI      | P-value |
|------------------------|----------|-------------|---------|
| Cohort                 |          |             | 0.03    |
| 82–85 (ref.)           | 0        | – – –       | –       |
| 91–92                  | 0.6      | 0.0 to 1.2  | 0.07    |
| 99–00                  | 1.0      | 0.3 to 1.8  | 0.008   |
| EP BPD                 | –0.2     | –0.6 to 0.3 | 0.45    |
| Gestational age, weeks | 0.2      | 0.0 to 0.3  | 0.07    |
| Birth weight z-score   | 0.3      | 0.1 to 0.5  | 0.006   |
| Prenatal steroids      | 0.3      | –0.2 to 0.8 | 0.22    |
| Surfactant             | –0.3     | –1.0 to 0.3 | 0.30    |
| Maternal smoking       | –0.1     | –0.5 to 0.3 | 0.67    |

Abbreviations: BPD: bronchopulmonary dysplasia (supplemental oxygen or respiratory support at postmenstrual age  $\geq 36$  weeks). EP: extremely preterm (gestational age  $\leq 28$  weeks or birth weight  $\leq 1000$  g). ref: reference level. CI: confidence interval

## References

1. Skjaerven R, Gjessing HK, Bakketeig LS. Birthweight by gestational age in Norway. *Acta obstetricia et gynecologica Scandinavica* 2000;79(6):440-9. [published Online First: 2000/06/17]
2. Shennan AT, Dunn MS, Ohlsson A, et al. Abnormal pulmonary outcomes in premature infants: prediction from oxygen requirement in the neonatal period. *Pediatrics* 1988;82(4):527-32. [published Online First: 1988/10/01]
3. Jobe AH, Bancalari E. Bronchopulmonary dysplasia. *Am J Respir Crit Care Med* 2001;163(7):1723-9. doi: 10.1164/ajrccm.163.7.2011060 [published Online First: 2001/06/13]
4. Markestad T, Kaarensen PI, Ronnestad A, et al. Early death, morbidity, and need of treatment among extremely premature infants. *Pediatrics* 2005;115(5):1289-98.
