# Supplementary figures and images for: Tracking of lung function from 10 to 35 years after being born extremely preterm or with extremely low birth weight
Source: PubMed Central journal article supplement — Thorax. 2022 Apr 11;77(8):790–8. doi: 10.1136/thoraxjnl-2021-218400 (PMC9340024; doi:10.1136/thoraxjnl-2021-218400), 2022-04-11

FEV1,  
% of  
maximum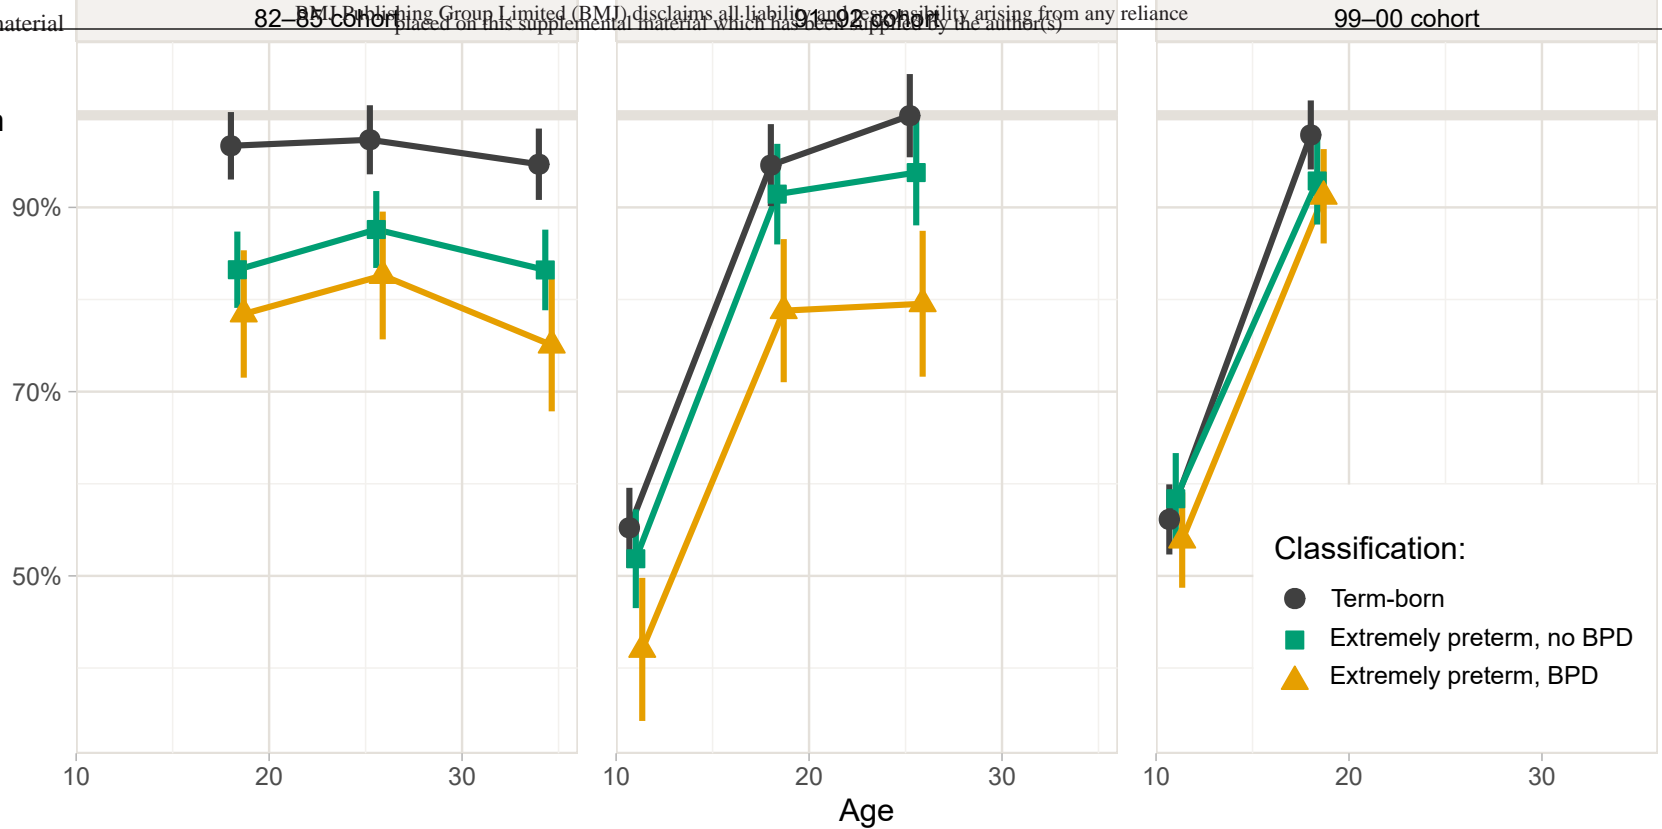

Supplement: thoraxjnl-2021-218400supp002.pdf [file thoraxjnl-2021-218400supp002.pdf]
